# Supplementary material
Source: MDPI journal article supplement (https://www.mdpi.com/1424-2818/14/11/983)
Supplement: s1 [file s1]

**Table S1.** Data from GenBank NCBI used in phylogenetic analyses.

| No | Species                                  | GenBank Accession numbers |                    |                    |
|----|------------------------------------------|---------------------------|--------------------|--------------------|
|    |                                          | <i>CR</i>                 | <i>COI</i>         | <i>RAG1</i>        |
| 1  | <i>Argyrocottus zanderi</i>              | MT890585                  | MT890585           | MW562158, MW562158 |
| 2  | <i>Artediellus ochotensis</i>            | --                        | --                 | MW562167           |
| 3  | <i>Artediellus uncinatus</i>             | --                        | --                 | KF141176           |
| 4  | <i>Enophrys diceraus</i>                 | KF039715                  | KY052777           | MW562152           |
| 5  | <i>Cottiusculus nihonkaiensis</i>        | MK224511                  | MK224511           | --                 |
| 6  | <i>Gymnocanthus pistilliger</i>          | --                        | --                 | MZ667613           |
| 7  | <i>Megalocottus platycephalus</i>        | MK936041, MK936042        | MH016200, MH016198 | MW562156           |
| 8  | <i>Microcottus sellaris</i>              | MT909823                  | MT909822, MN877738 | MW562153, MW562154 |
| 9  | <i>Myoxocephalus brandtii</i>            | --                        | MN877735, MN115337 | MW562165           |
| 10 | <i>Myoxocephalus jaok</i>                | MN162694, MN162695        | MN162694, MN162695 | MW562163           |
| 11 | <i>Myoxocephalus ochotensis</i>          | --                        | --                 | MW562164           |
| 12 | <i>Myoxocephalus polyacanthocephalus</i> | MK621914                  | MN115338           | MW562162           |
| 13 | <i>Myoxocephalus scorpius</i>            | MK321578                  | HM421745, MK321578 | --                 |
| 14 | <i>Myoxocephalus stelleri</i>            | AB188174                  | MN115327, MN115333 | MW562161           |
| 15 | <i>Porocottus allisi</i>                 | --                        | MT906796           | --                 |
| 16 | <i>Porocottus camtschaticus</i>          | --                        | MH172266           | MW562157           |
| 17 | <i>Porocottus japonicus</i>              | --                        | MH172275           | MW562159           |
| 18 | <i>Porocottus minutus</i>                | --                        | MH172270           | MW562158           |
| 19 | <i>Taurulus bubalis</i>                  | MT410868                  | KJ205222           | --                 |
| 20 | <i>Trigloporus thompsonii</i>            | --                        | KX145164           | --                 |
