# Supplementary material
Source: MDPI journal article supplement (https://www.mdpi.com/1424-2818/14/11/983)
Supplement: s1 [file s1]

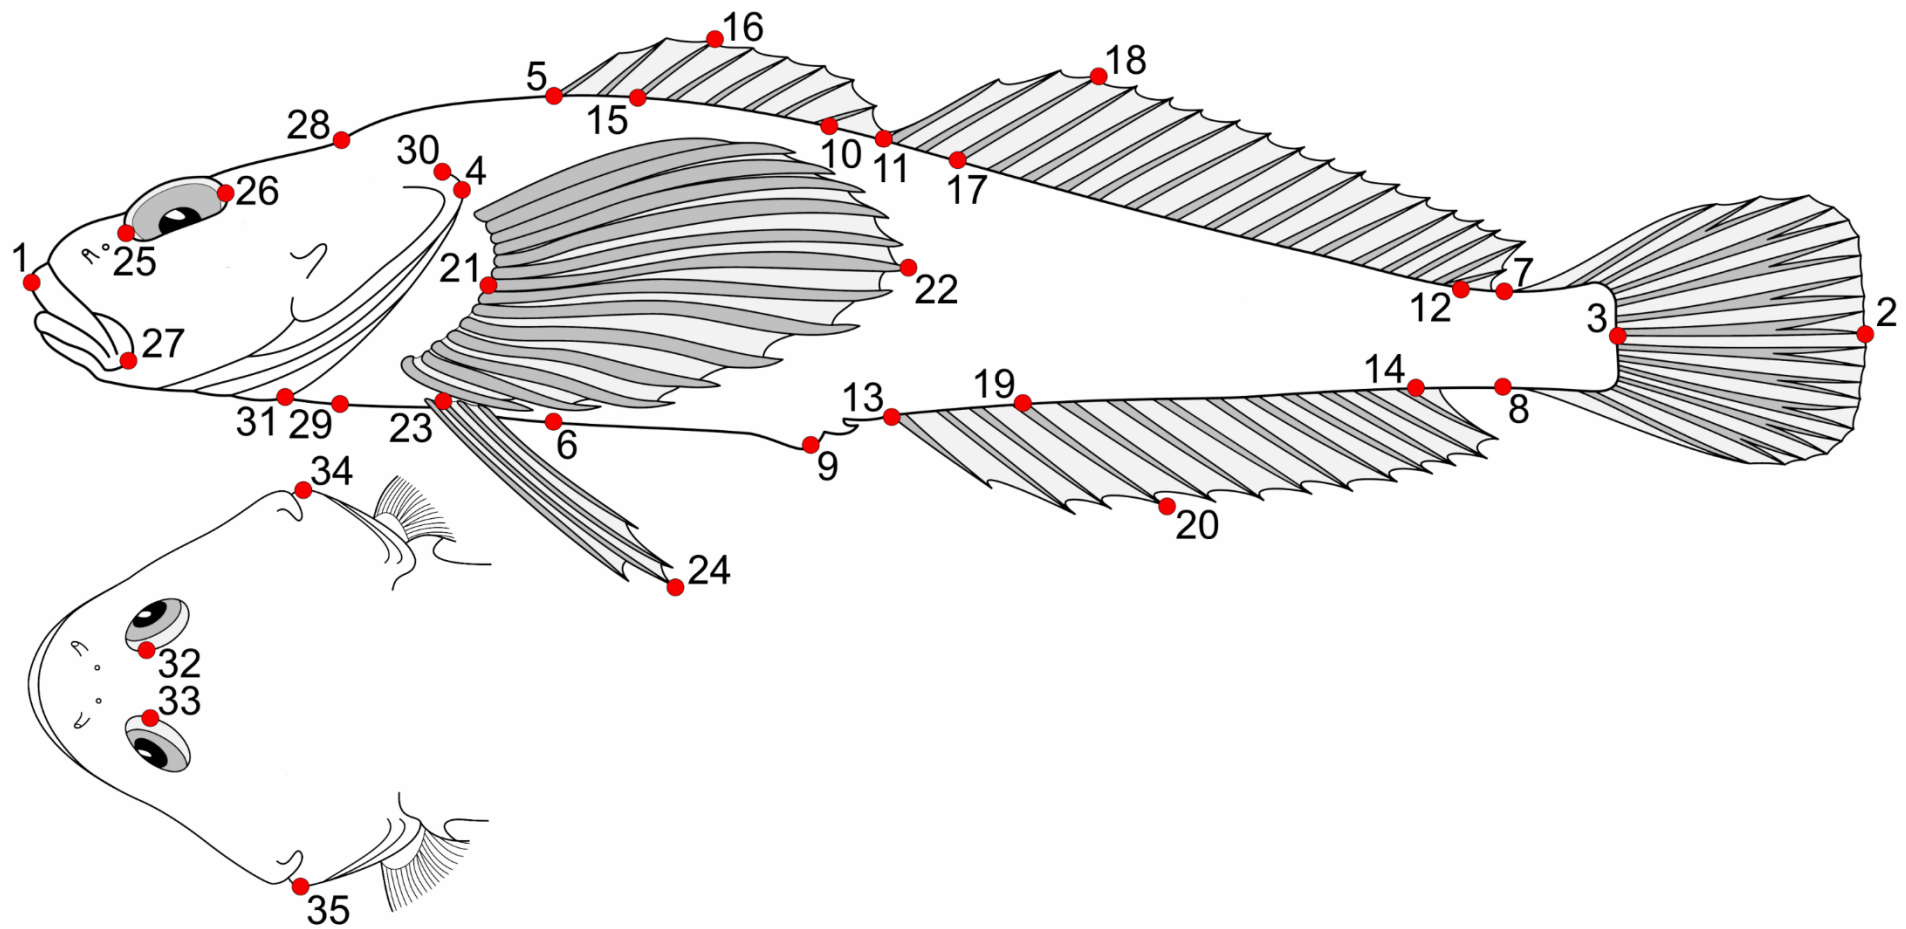

**Figure S1.** Scheme of measurements: 1–2, total length; 1–3, standard length (SL); 1–4, head length; 1–5, predorsal length; 1–9, preanal length; 5–6, maximum body depth; 7–8, depth of caudal peduncle; 14–3, length of caudal peduncle; 5–10, length of first dorsal-fin base; 11–12, length of second dorsal-fin base; 10–11, distance between first and second dorsal fins; 13–14, length of anal-fin base; 15–16, length of longest first dorsal-fin ray; 17–18, length of longest second dorsal-fin ray; 19–20, length of longest anal-fin ray; 21–22, pectoral-fin length; 23–24, pelvic-fin length; 25–26, eye horizontal diameter; 28–29, head depth; 1–25, snout length; 26–4, postorbital length; 1–27, upper jaw length; 30–31, length of gill slit; 32–33, interorbital width; 34–35, head width.
